# Supplementary material for: Increased respiratory modulation of cardiovascular control reflects improved blood pressure regulation in pregnancy
Source: Frontiers journal article supplement (doi:10.3389/fphys.2023.1070368), 2023-03-21
Supplement: Data_Sheet_1.PDF [file Data_Sheet_1.PDF]

# Increased respiratory modulation of cardiovascular control reflects improved blood pressure regulation in pregnancy

Martín Miranda Hurtado, Craig D. Steinback, Margie H. Davenport, Maria Rodriguez-Fernandez

## Supplementary Material

### 1 Supplementary Figures and Tables

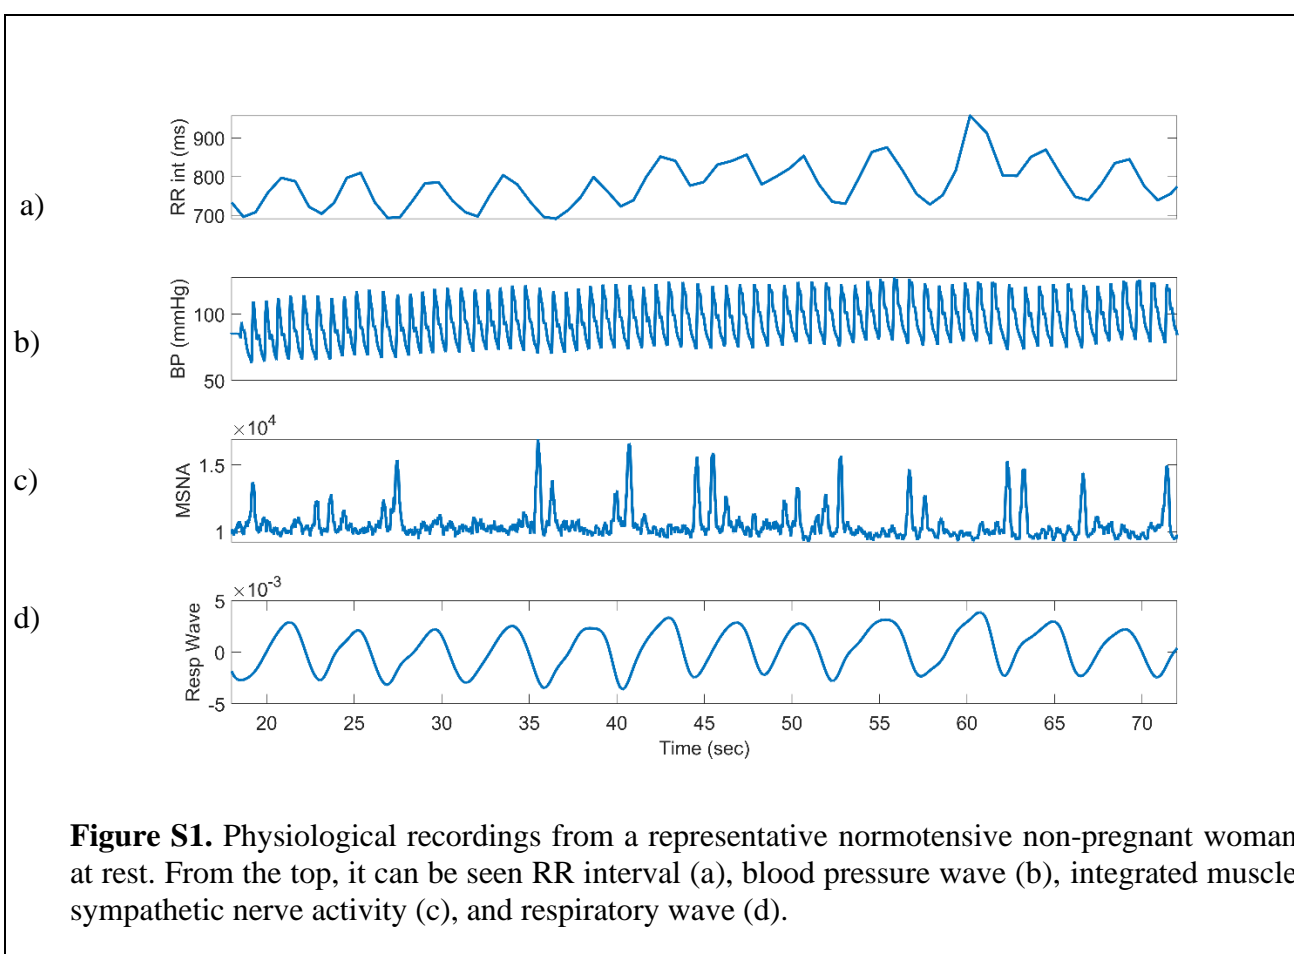

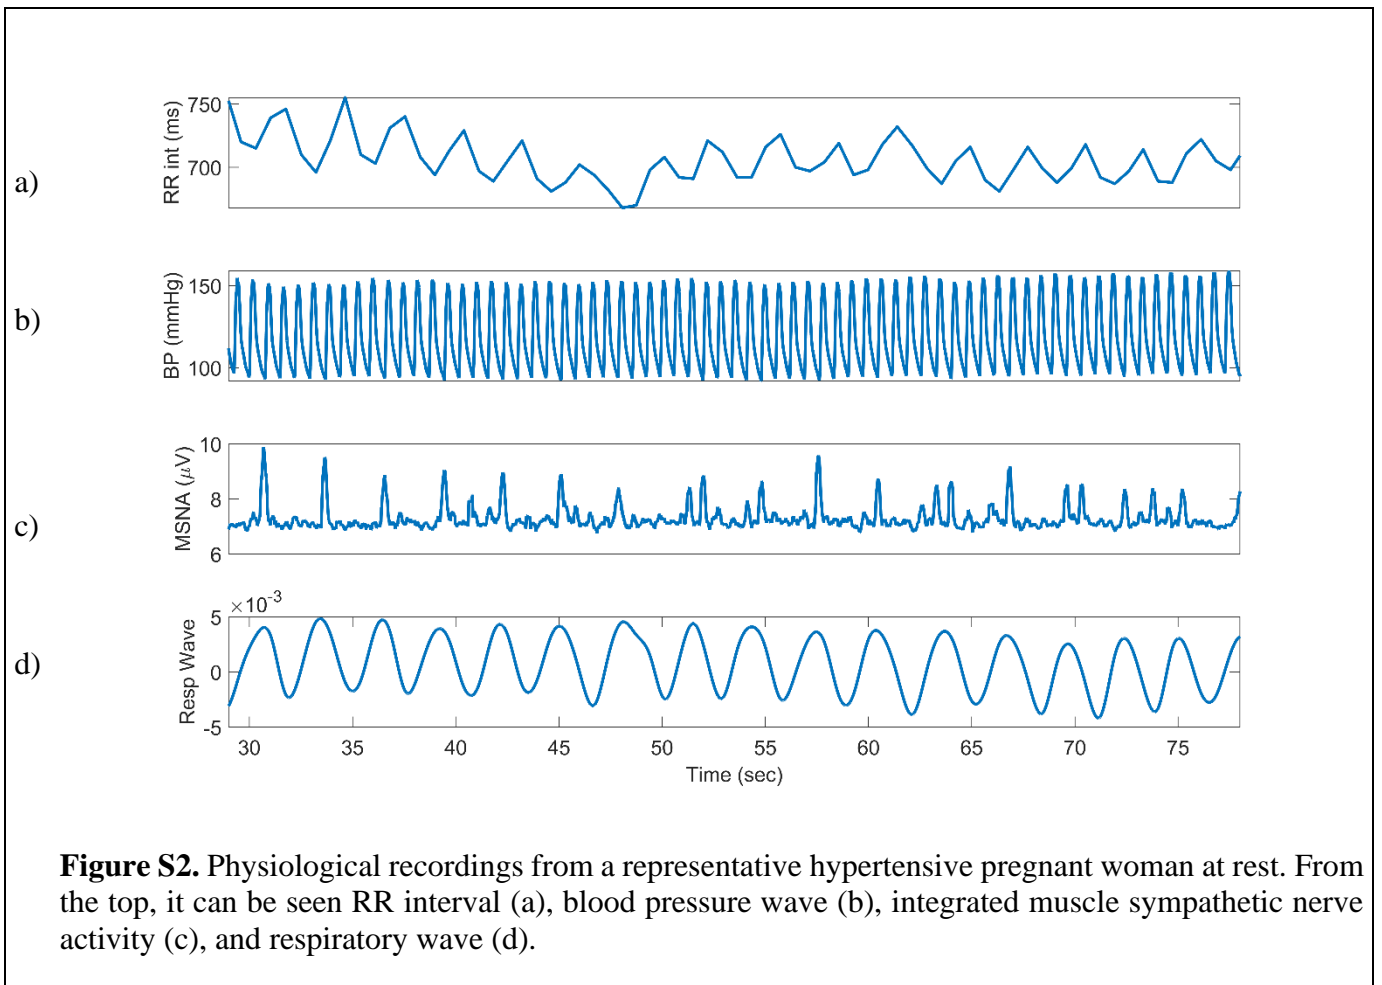

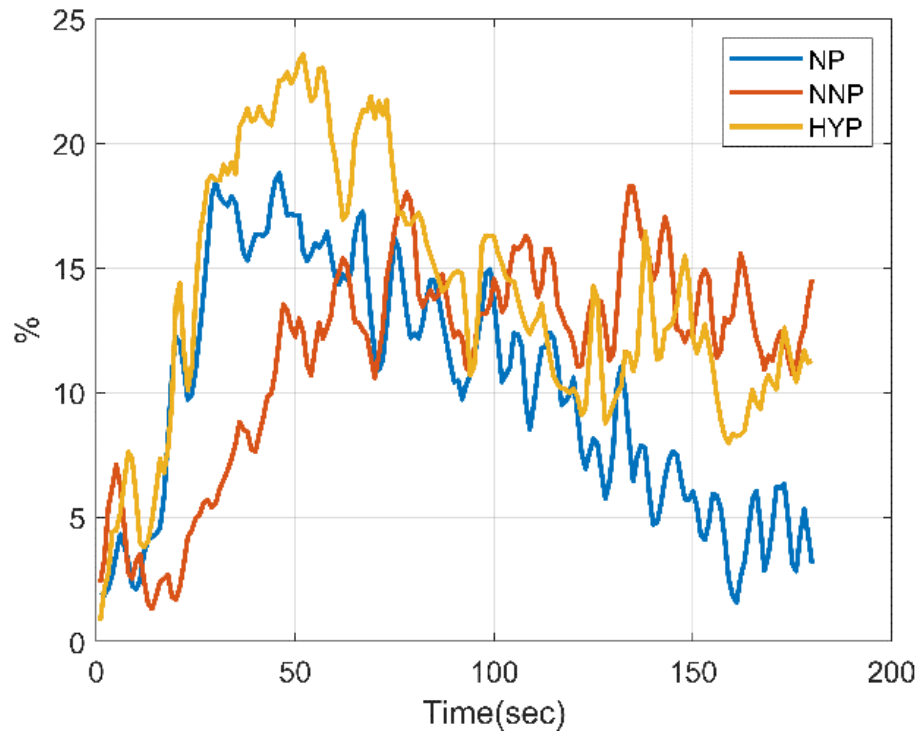

**Figure S3.** Response to cold pressor in terms of percentage increase from baseline in systolic blood pressure. Curves with a mean moving window of 3 seconds or normotensive pregnant women (NP), normotensive non-pregnant women (NNP), and hypertensive pregnant women (HYP).

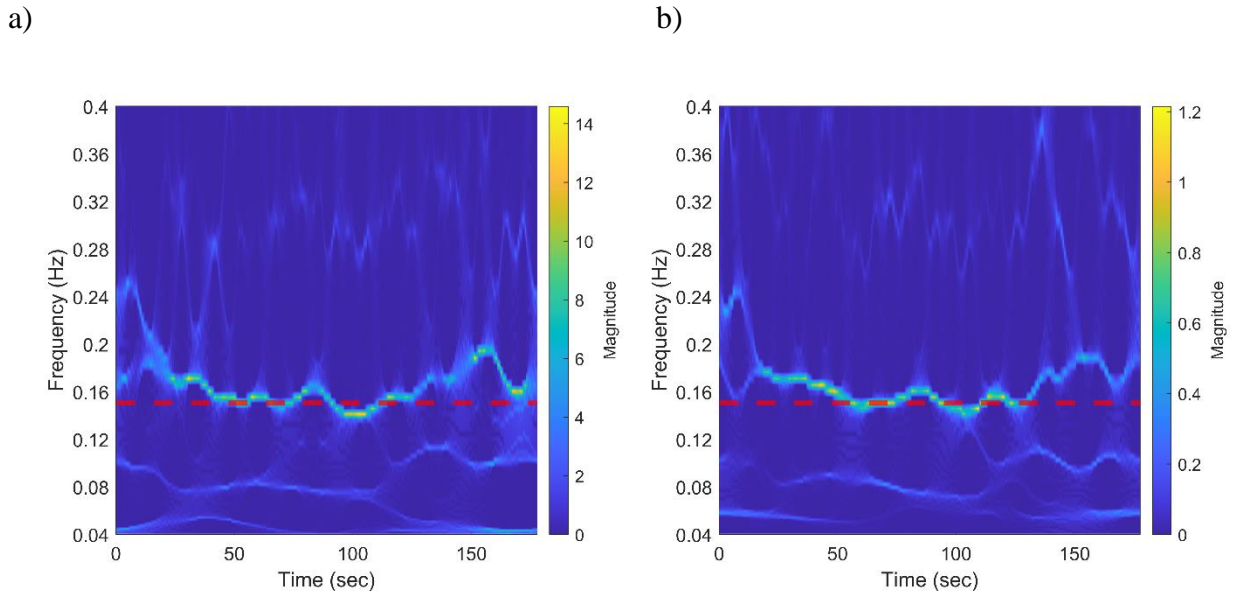

**Figure S4.** Results of synchrosqueezed transform from a representative normotensive pregnant subject during cold pressor test. (a) RR interval; (b) systolic blood pressure. The red dotted line separates the low-frequency band (0.04-0.15 Hz) from the high-frequency band (0.15-0.4 Hz). A bridge representing respiration modulation can be clearly seen in the HF band. In the LF band, almost three bridges that cross each other can be identified.

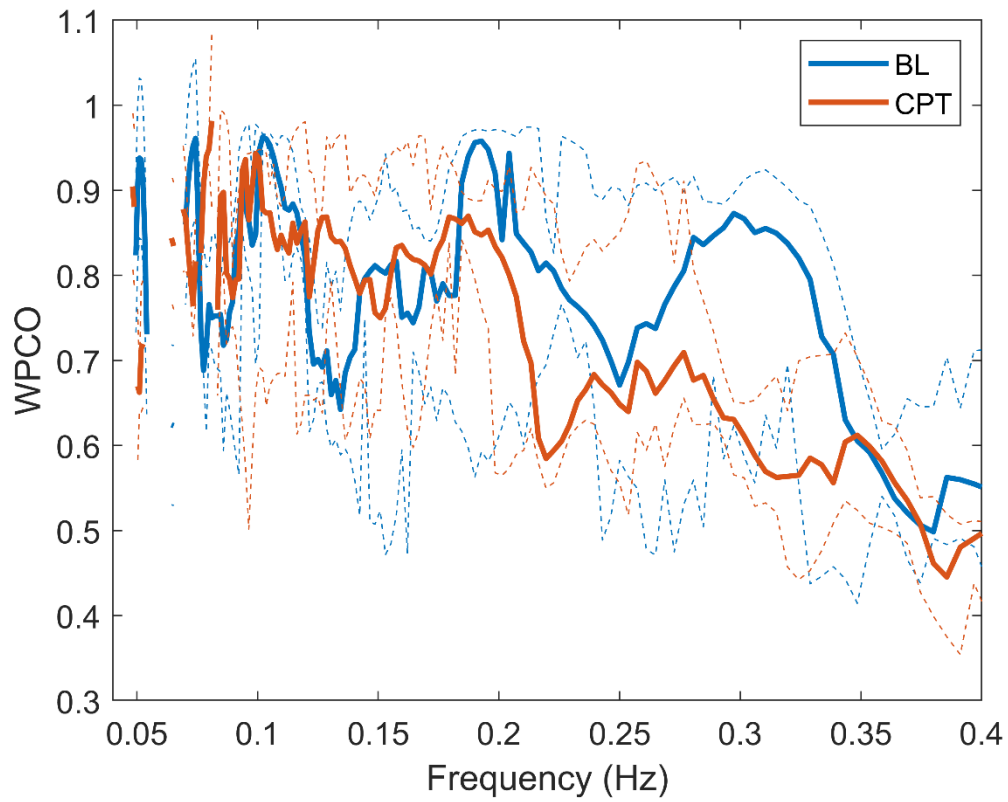

**Figure S5.** Wavelet phase coherence of RR interval and systolic blood pressure for the normotensive pregnant group during baseline (BL) and cold pressor test (CPT) in terms of median and 95% IC. \*Indicates significant differences between BL and CPT.

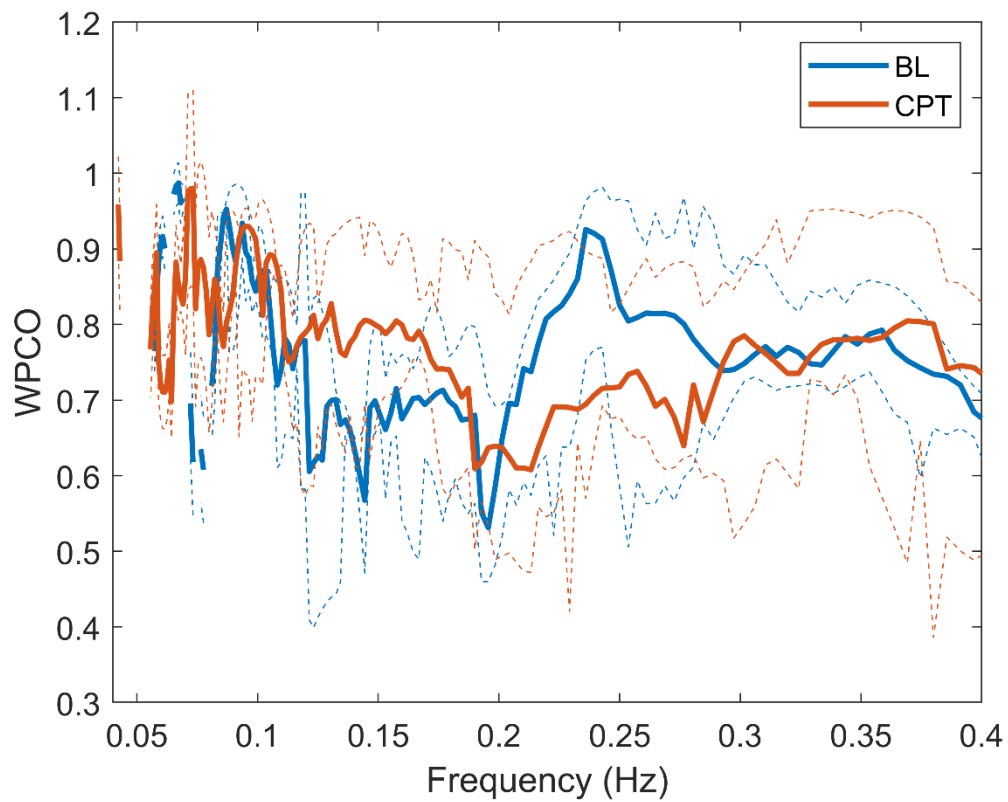

**Figure S6.** Wavelet phase coherence of RR interval and systolic blood pressure for the hypertensive pregnant group during baseline (BL) and cold pressor test (CPT) in terms of median and 95% IC. \*Indicates significant differences between BL and CPT.

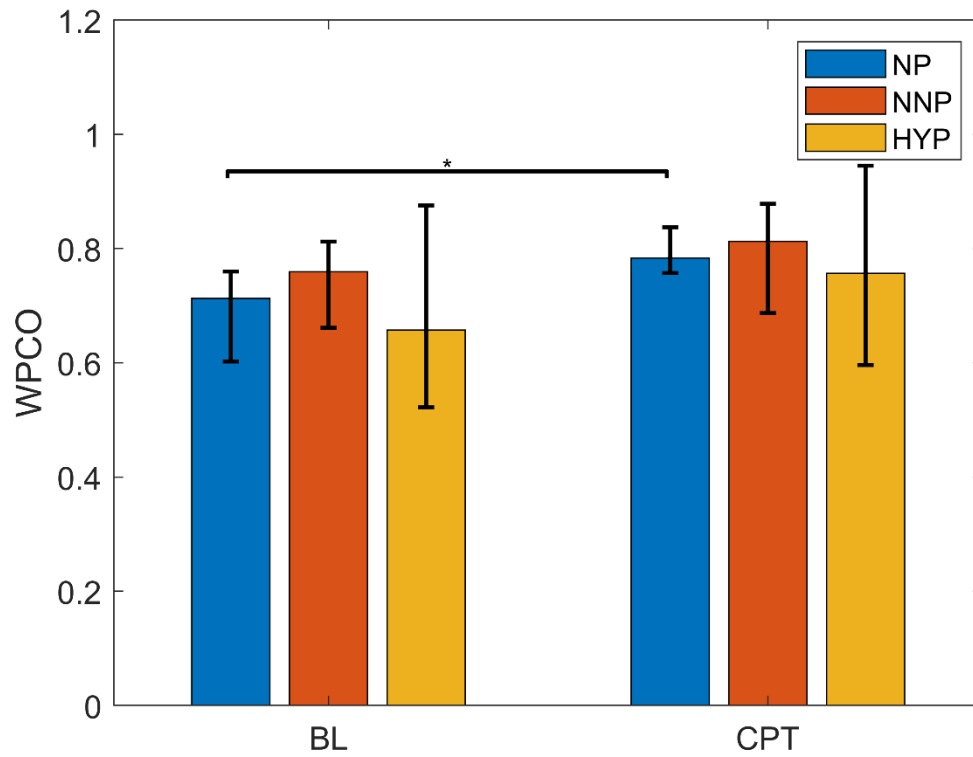

**Figure S7.** Wavelet phase coherence (WPCO) results for normotensive pregnant women (NP), normotensive non-pregnant women (NNP), and hypertensive pregnant women (HYP) in terms of median and 95% IC during baseline (BL) and cold pressor test (CPT). Results show WPCO between RR interval and DBP in the low-frequency band (LF). \* represents  $p < 0.05$ .

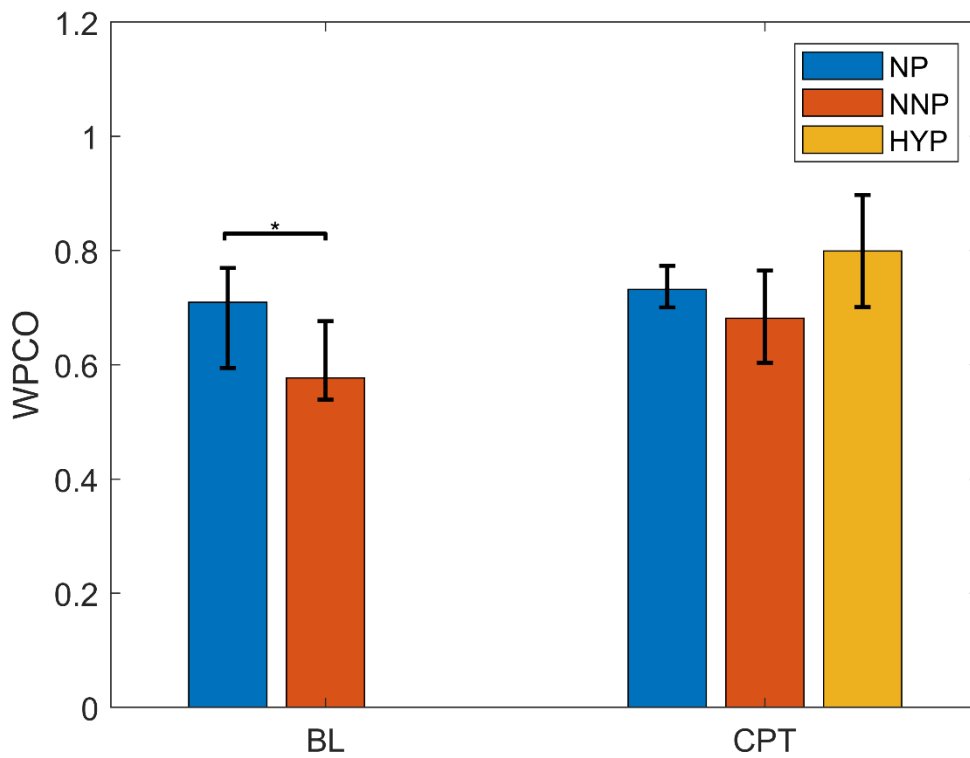

**Figure S8.** Wavelet phase coherence (WPCO) results for normotensive pregnant women (NP), normotensive non-pregnant women (NNP), and hypertensive pregnant women (HYP) in terms of median and 95% IC during baseline (BL) and Cold Pressor Test (CPT). Results show WPCO between respiration and diastolic blood pressure (DBP) in the low-frequency band (LF). No phase coherence values were obtained for the HYP group at baseline; therefore, the bar for this group is not shown. \* represents  $p < 0.05$ .



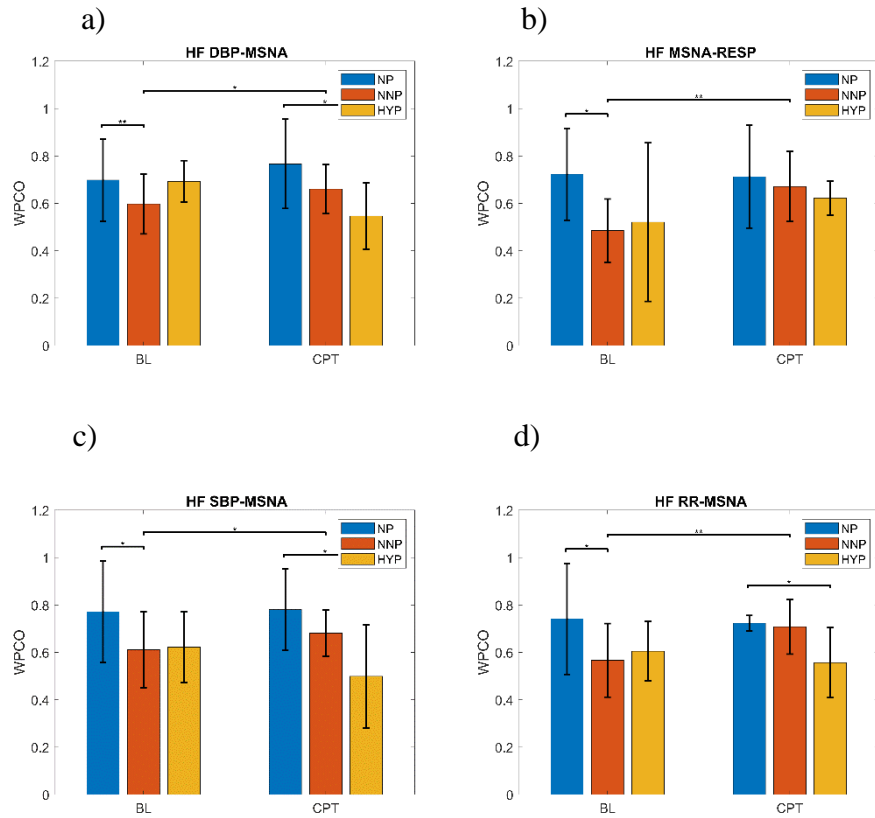

**Figure S9.** Wavelet phase coherence (WPCO) results for normotensive pregnant women (NP), normotensive non-pregnant women (NNP), and hypertensive pregnant women (HYP) in terms of median and interquartile range during baseline (BL) and cold pressor test (CPT). Results show WPCO between muscle sympathetic nerve activity (MSNA) and diastolic blood pressure (DBP) (a), MSNA and respiratory wave (RESP) (b), MSNA and systolic blood pressure (SBP) (c), and MSNA and RR interval (d) in the high-frequency band (HF). \* represents  $p < 0.05$ . \*\* represents  $p < 0.01$ .

|     |     |    | RR-SBP | RR-DBP | RR-MSNA | RR-RESP | SBP-MSNA | SBP-RESP | DBP-MSNA | DBP-RESP | MSNA-RESP |
|-----|-----|----|--------|--------|---------|---------|----------|----------|----------|----------|-----------|
| NP  | BL  | HF | 10     | 10     | 9       | 10      | 10       | 10       | 10       | 10       | 9         |
|     |     | LF | 8      | 10     | 7       | 6       | 8        | 5        | 7        | 5        | 5         |
|     | CPT | HF | 9      | 9      | 8       | 10      | 9        | 9        | 10       | 9        | 9         |
|     |     | LF | 9      | 7      | 8       | 8       | 8        | 7        | 8        | 7        | 7         |
| NNP | BL  | HF | 10     | 10     | 10      | 10      | 10       | 9        | 10       | 9        | 9         |
|     |     | LF | 10     | 10     | 9       | 8       | 8        | 5        | 10       | 6        | 5         |
|     | CPT | HF | 10     | 9      | 9       | 10      | 9        | 10       | 10       | 9        | 7         |
|     |     | LF | 9      | 9      | 9       | 6       | 8        | 4        | 8        | 4        | 4         |
| HYP | BL  | HF | 9      | 6      | 7       | 9       | 6        | 6        | 7        | 8        | 6         |
|     |     | LF | 7      | 4      | 5       | 3       | 4        | 1        | 5        | 0        | 1         |
|     | CPT | HF | 9      | 7      | 5       | 8       | 4        | 7        | 5        | 7        | 5         |
|     |     | LF | 8      | 4      | 2       | 2       | 3        | 5        | 4        | 2        | 5         |

**Table S1.** Number of subjects per group with significant values of wavelet phase coherence results in the low and high-frequency band during the Baseline and Cold Pressor Test (CPT). The table shows the results for normotensive non-pregnant women (NNP), normotensive pregnant women (NP), and hypertensive pregnant women (HYP). RR: RR interval. DBP: Diastolic blood pressure. SBP: Systolic blood pressure. MSNA: Muscle sympathetic nerve activity. RESP: Respiratory wave.

|                  | Baseline |        |        | Cold pressor test |        |        |
|------------------|----------|--------|--------|-------------------|--------|--------|
|                  | NP(%)    | NNP(%) | HYP(%) | NP(%)             | NNP(%) | HYP(%) |
| <b>RR-SBP</b>    | 0        | 0      | 14.3   | 0                 | 0      | 0      |
| <b>RR-DBP</b>    | 0        | 0      | 0      | 0                 | 0      | 0      |
| <b>RR-MSNA</b>   | 0        | 0      | 0      | 25                | 0      | 0      |
| <b>RR-RESP</b>   | 0        | 0      | 0      | 0                 | 0      | 0      |
| <b>SBP-MSNA</b>  | 0        | 0      | 0      | 0                 | 0      | 0      |
| <b>SBP-RESP</b>  | 0        | 0      | 0      | 0                 | 0      | 0      |
| <b>DBP-MSNA</b>  | 0        | 0      | 16.7   | 0                 | 0      | 0      |
| <b>DBP-RESP</b>  | 0        | 0      | 0      | 0                 | 0      | 0      |
| <b>MSNA-RESP</b> | 0        | 0      | 0      | 0                 | 0      | 0      |

**Table S2.** Percentage of outliers in phase coherence results for normotensive pregnant women (NP), normotensive-non pregnant women (NNP), and hypertensive pregnant women (HYP) during baseline and cold pressor test in the high-frequency band. Results are shown in terms of the percentage of elements more than 1.5 interquartile ranges above the upper quartile (75 percent) or below the lower quartile (25 percent).

|                  | Baseline |        |        | Cold pressor test |        |        |
|------------------|----------|--------|--------|-------------------|--------|--------|
|                  | NP(%)    | NNP(%) | HYP(%) | NP(%)             | NNP(%) | HYP(%) |
| <b>RR-SBP</b>    | 0        | 0      | 0      | 0                 | 11.1   | 0      |
| <b>RR-DBP</b>    | 20       | 0      | 0      | 14.3              | 0      | 0      |
| <b>RR-MSNA</b>   | 0        | 11.1   | 0      | 0                 | 0      | 0      |
| <b>RR-RESP</b>   | 0        | 0      | 0      | 0                 | 0      | 0      |
| <b>SBP-MSNA</b>  | 0        | 0      | 0      | 0                 | 0      | 0      |
| <b>SBP-RESP</b>  | 0        | 0      | 0      | 0                 | 0      | 0      |
| <b>DBP-MSNA</b>  | 0        | 0      | 0      | 12.5              | 12.5   | 0      |
| <b>DBP-RESP</b>  | 0        | 0      | -      | 28.6              | 0      | 0      |
| <b>MSNA-RESP</b> | 0        | 0      | 0      | 0                 | 0      | 0      |

**Table S3.** Percentage of outliers in phase coherence results for normotensive pregnant women (NP), normotensive-non pregnant women (NNP) and hypertensive pregnant women (HYP) during baseline and cold pressor test in the low-frequency band. Results are shown in terms of the percentage of elements more than 1.5 interquartile ranges above the upper quartile (75 percent) or below the lower quartile (25 percent).

|            |            | RR-SBP               | RR-DBP              | RR-MSNA                          | RR-RESP             | SBP-MSNA                         | SBP-RESP            | DBP-MSNA                         | DBP-RESP            | MSNA-RESP            |
|------------|------------|----------------------|---------------------|----------------------------------|---------------------|----------------------------------|---------------------|----------------------------------|---------------------|----------------------|
| <b>NP</b>  | <b>BL</b>  | 0.76<br>(0.58-0.94)  | 0.77<br>(0.56-0.98) | 0.74†<br>(0.51-0.97)             | 0.77<br>(0.46-1.08) | 0.77†<br>(0.56-0.98)             | 0.73<br>(0.51-0.95) | 0.70†<br>(0.53-0.87)             | 0.73<br>(0.53-0.93) | 0.72†<br>(0.53-0.91) |
|            | <b>CPT</b> | 0.78<br>(0.61-0.95)  | 0.82<br>(0.69-0.95) | 0.72<br>(0.69-0.75)              | 0.81<br>(0.59-1.03) | 0.78<br>(0.61-0.95)              | 0.83<br>(0.76-0.9)  | 0.77<br>(0.58-0.96)              | 0.82<br>(0.56-1.08) | 0.71<br>(0.49-0.93)  |
| <b>NNP</b> | <b>BL</b>  | 0.75*<br>(0.65-0.85) | 0.73<br>(0.59-0.87) | 0.57*<br>(0.41-0.73)             | 0.63<br>(0.45-0.81) | 0.61*<br>(0.45-0.77)             | 0.68<br>(0.42-0.94) | 0.60*<br>(0.47-0.73)             | 0.58<br>(0.4-0.76)  | 0.48*<br>(0.35-0.61) |
|            | <b>CPT</b> | 0.83<br>(0.68-0.98)  | 0.81<br>(0.66-0.96) | 0.71 <sup>^</sup><br>(0.59-0.83) | 0.71<br>(0.53-0.89) | 0.68 <sup>^</sup><br>(0.58-0.78) | 0.73<br>(0.52-0.94) | 0.66 <sup>^</sup><br>(0.56-0.76) | 0.73<br>(0.43-1.03) | 0.67<br>(0.52-0.82)  |
| <b>HYP</b> | <b>BL</b>  | 0.72<br>(0.64-0.8)   | 0.78<br>(0.66-0.9)  | 0.61<br>(0.48-0.74)              | 0.59<br>(0.43-0.75) | 0.62<br>(0.47-0.77)              | 0.70<br>(0.55-0.85) | 0.69<br>(0.6-0.78)               | 0.61<br>(0.39-0.83) | 0.52<br>(0.19-0.85)  |
|            | <b>CPT</b> | 0.67<br>(0.49-0.85)  | 0.75<br>(0.54-0.96) | 0.56<br>(0.41-0.71)              | 0.66<br>(0.44-0.88) | 0.50<br>(0.28-0.72)              | 0.63<br>(0.41-0.85) | 0.55<br>(0.41-0.69)              | 0.58<br>(0.37-0.79) | 0.62<br>(0.55-0.69)  |

**Table S4.** Wavelet phase coherence results in the high-frequency band. The table shows the results for normotensive non-pregnant women (NNP), normotensive pregnant women (NP), and hypertensive pregnant women (HYP) during baseline (BL) and cold pressor test (CPT) in terms of median and interquartile range. RR: RR interval. DBP: Diastolic blood pressure. SBP: Systolic blood pressure. MSNA: Muscle sympathetic nerve activity. RESP: Respiratory wave. \*: significant difference with CPT. †: significant difference with NNP. <sup>^</sup>: Significant difference with HYP.

|     |     | RR-SBP              | RR-DBP              | RR-MSNA             | RR-RESP             | SBP-MSNA            | SBP-RESP            | DBP-MSNA            | DBP-RESP             | MSNA-RESP           |
|-----|-----|---------------------|---------------------|---------------------|---------------------|---------------------|---------------------|---------------------|----------------------|---------------------|
| NP  | BL  | 0.68<br>(0.5-0.86)  | 0.71*<br>(0.62-0.8) | 0.68<br>(0.54-0.82) | 0.77<br>(0.59-0.95) | 0.68<br>(0.52-0.84) | 0.68<br>(0.52-0.84) | 0.76<br>(0.69-0.83) | 0.71†<br>(0.57-0.85) | 0.65<br>(0.5-0.8)   |
|     | CPT | 0.74<br>(0.59-0.89) | 0.78<br>(0.71-0.85) | 0.76<br>(0.59-0.93) | 0.73<br>(0.6-0.86)  | 0.76<br>(0.59-0.93) | 0.7<br>(0.58-0.82)  | 0.79<br>(0.71-0.87) | 0.73<br>(0.66-0.8)   | 0.61<br>(0.44-0.78) |
| NNP | BL  | 0.73<br>(0.53-0.93) | 0.76<br>(0.61-0.91) | 0.74<br>(0.59-0.89) | 0.69<br>(0.51-0.87) | 0.78<br>(0.6-0.96)  | 0.7<br>(0.52-0.88)  | 0.76<br>(0.6-0.92)  | 0.58<br>(0.48-0.68)  | 0.64<br>(0.49-0.79) |
|     | CPT | 0.82<br>(0.7-0.94)  | 0.81<br>(0.69-0.93) | 0.77<br>(0.59-0.95) | 0.8<br>(0.62-0.98)  | 0.78<br>(0.64-0.92) | 0.76<br>(0.55-0.97) | 0.8<br>(0.69-0.91)  | 0.68<br>(0.57-0.79)  | 0.72<br>(0.55-0.89) |
| HYP | BL  | 0.65<br>(0.5-0.8)   | 0.66<br>(0.4-0.92)  | 0.62<br>(0.52-0.72) | 0.61<br>(0.59-0.63) | 0.56<br>(0.45-0.67) | 0<br>(0-0)          | 0.63<br>(0.46-0.8)  | 0<br>(0-0)           | 0<br>(0-0)          |
|     | CPT | 0.76<br>(0.62-0.9)  | 0.76<br>(0.54-0.98) | 0.69<br>(0.55-0.83) | 0.86<br>(0.68-1.04) | 0.65<br>(0.44-0.86) | 0.73<br>(0.56-0.9)  | 0.69<br>(0.59-0.79) | 0.80<br>(0.6-1)      | 0.70<br>(0.49-0.91) |

**Table S5.** Wavelet phase coherence results in the low-frequency band. The table shows the results for normotensive non-pregnant women (NNP), normotensive pregnant women (NP), and hypertensive pregnant women (HYP) during baseline (BL) and cold pressor test (CPT) in terms of median and interquartile range. RR: RR interval. DBP: Diastolic blood pressure. SBP: Systolic blood pressure. MSNA: Muscle sympathetic nerve activity. RESP: Respiratory wave. \*: significant difference with CPT. †: significant difference with NNP.
